# Supplementary material
Source: PubMed Central journal article supplement (PMC3305047)
Supplement: NIHMS360699-supplement-Supplement.pdf [file NIHMS360699-supplement-Supplement.pdf]

**ONLINE SUPPLEMENT**

**INTERACTIVE HEMODYNAMIC EFFECTS OF DPP-4 INHIBITION AND ACE  
INHIBITION IN HUMANS**

**Annis Marney, Siri Kunchakarra, Loretta Byrne, Nancy J. Brown**

**University of Vermont Division of Endocrinology, Department of Medicine (AM),  
Vanderbilt University School of Medicine (SK), Vanderbilt University Division of Clinical  
Pharmacology, Department of Medicine (LB, NJB)**

Running Title: DPP-4 inhibition and acute ACE inhibition

Correspondence: Annis Marney, MD, MSCI  
Assistant Professor of Medicine  
University of Vermont School of Medicine  
Colchester Research Facility Room 110  
208 South Park Drive  
Colchester, VT 05446  
(802)656-2177  
Annis.marney@uvm.edu

Word count of manuscript: 3930

Word count of abstract: 248

Number of figures: 3

Supplemental Table S1

**Table S1: Subjects characteristics: hypertensive versus normotensive**

| <i>Patient group</i>                       | <i>Hypertensive</i> | <i>Normotensive</i> |                |
|--------------------------------------------|---------------------|---------------------|----------------|
| <i>Parameter</i>                           | <i>Value</i>        | <i>Value</i>        | <i>P value</i> |
| Age (years)                                | 45.83±12.78         | 39.83±8.12          | 0.06           |
| Race (African-American:Caucasian:Hispanic) | 1:9:2               | 4:8:0               | 0.76           |
| Gender (Male:Female)                       | 7:5                 | 6:6                 | 0.70           |
| Hypertension (Yes:No)                      | 12:0                | 0:12                | 1.0            |
| Impaired fasting glucose (Yes:No)          | 7:5                 | 3:9                 | 0.11           |
| Impaired glucose tolerance (Yes:No)        | 7:5                 | 7:5                 | 1.0            |
| Metabolic syndrome (Yes:No)                | 12:0                | 12:0                | 1.0            |
| Type 2 DM (Yes:No)                         | 3:9                 | 1:11                | 0.29           |
| Obstructive sleep apnea (Yes:No)           | 1:11                | 4:8                 | 0.17           |
| Family history of DM (Yes:No)              | 7:5                 | 5:7                 | 0.44           |
| Family history of HTN (Yes:No)             | 8:4                 | 5:7                 | 0.24           |
| BMI (kg/M <sup>2</sup> )                   | 35.33±5.54          | 35.96±2.96          | 0.73           |
| % Fat                                      | 37.03±10.41         | 38.23±9.60          | 0.78           |
| Fasting plasma glucose (mg/dL)             | 101.58±8.94         | 98.58±11.78         | 0.49           |
| Serum triglycerides (mg/dL)                | 105.58±39.22        | 156.58±65.30        | <b>0.03</b>    |
| Serum HDL (mg/dL)                          | 42.42±15.02         | 42.25±17.22         | 0.98           |
| Systolic blood pressure (mmHg)             | 139.98±14.57        | 128.29±12.17        | <b>0.045</b>   |
| Diastolic blood pressure (mmHg)            | 91.33±8.64          | 82.95±7.92          | <b>0.02</b>    |
| Mean arterial pressure (mmHg)              | 107.60±10.04        | 98.11±8.64          | <b>0.02</b>    |
| Heart rate (beats per minute)              | 77.02±9.68          | 77.91±14.33         | 0.86           |
| Waist girth (cm)                           | 118.25±7.31         | 116.83±10.61        | 0.71           |
